# Supplementary material
Source: publisher site journal article supplement (https://www.spandidos-publications.com/7497/downloadSupplementary)
Supplement: Supplementary file 1 [file downloadSupplementary]

Table SI. Primers used in the reverse transcription-quantitative PCR.

| Gene                   | Sequence (5' to 3') |                         |
|------------------------|---------------------|-------------------------|
| PI3K (mouse)           | Forward             | CACCTGAACAGACAAGTAGAGGC |
|                        | Reverse             | GCAAAGCATCCATGAAGTCTGGC |
| $\beta$ -actin (mouse) | Forward             | GTGACGTTGACATCCGTAAAGA  |
|                        | Reverse             | GCCGGACTCATCGTACTCC     |
| PI3K (human)           | Forward             | GGACCCGATGCGGTTAGAG     |
|                        | Reverse             | ATCAAGTGGATGCCCCACAG    |
| $\beta$ -actin (human) | Forward             | GTTGCTATCCAGGCTGTG      |
|                        | Reverse             | TGATCTTGATCTTCATTGTG    |

PI3K, phosphatidylinositol 3-kinase.
